# Supplementary material for: Cooperative dissolution of peptidomimetic vesicles and amyloid β fibrils
Source: Royal Society of Chemistry journal article supplement (doi:10.1039/d3nr04847k), 2024-01-01

## Electronic supplementary information (ESI)

### Cooperative dissolution of peptidomimetic vesicles and amyloid $\beta$ fibrils

Soumik Dinda, Debasis Ghosh and T. Govindaraju\*

*Bioorganic Chemistry Laboratory, New Chemistry Unit and School of Advanced Materials (SAMat), Jawaharlal Nehru Centre for Advanced Scientific Research (JNCASR), Jakkur P.O., Bengaluru 560064, Karnataka, India*

\*To whom correspondence should be addressed. E-mail: [tgraju@jncasr.ac.in](mailto:tgraju@jncasr.ac.in)

#### Table of Contents

|                                                                                          |     |
|------------------------------------------------------------------------------------------|-----|
| 1. General synthetic scheme for peptidomimetic amphiphiles.....                          | S2  |
| 2. CAC plot for peptidomimetic amphiphiles .....                                         | S3  |
| 3. TEM, FESEM, AFM, and DLS data of Akd <sup>c</sup> Py vesicle .....                    | S4  |
| 4. UV-vis spectra of RhB entrapped vesicles and free RhB .....                           | S5  |
| 5. Calibration plot of RhB .....                                                         | S5  |
| 6. Fluorescence microscopy images of RhB loaded vesicles .....                           | S6  |
| 7. Emission spectra of RhB entrapped vesicle and treatment of triton X-100 .....         | S7  |
| 8. Fluorescence microscopy images of berberine loaded Akd <sup>m</sup> Py vesicles ..... | S8  |
| 9. Calibration plot of berberine (Ber) .....                                             | S8  |
| 10. CD spectra of A $\beta$ 42 and A $\beta$ 14-23 .....                                 | S9  |
| 11. Time-dependent thioflavin T (ThT) assay.....                                         | S10 |
| 12. Characterizations of the peptidomimetics by HPLC .....                               | S11 |
| 13. Characterizations of the peptidomimetics by HRMS .....                               | S12 |
| 14. HPLC chromatogram and HRMS of Akd <sup>c</sup> Py .....                              | S13 |
| 15. HPLC chromatogram and HRMS of Akd <sup>m</sup> Py .....                              | S14 |
| 16. HPLC chromatogram and HRMS of Akd <sup>n</sup> Py .....                              | S15 |

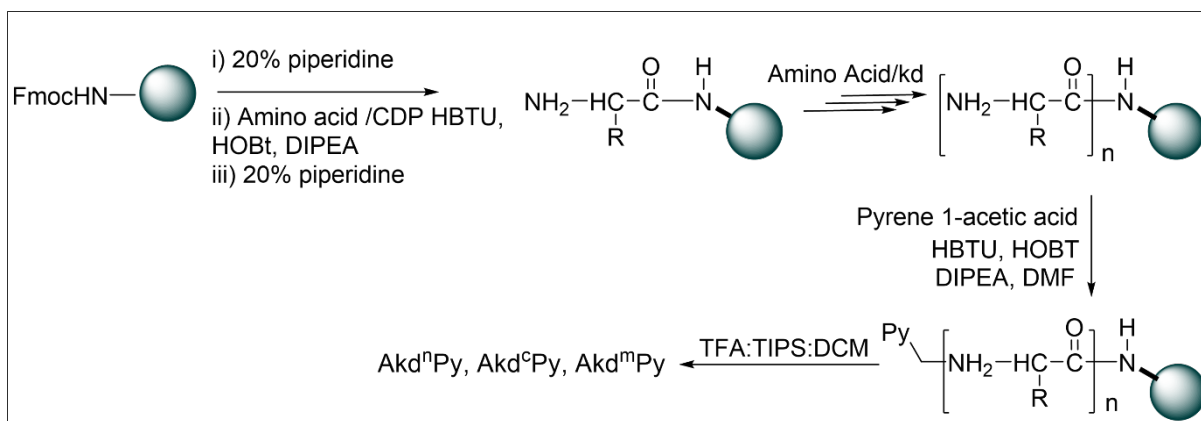

**Scheme S1** General synthetic route for peptidomimetic amphiphiles (Akd<sup>c</sup>Py, Akd<sup>m</sup>Py, and Akd<sup>n</sup>Py).

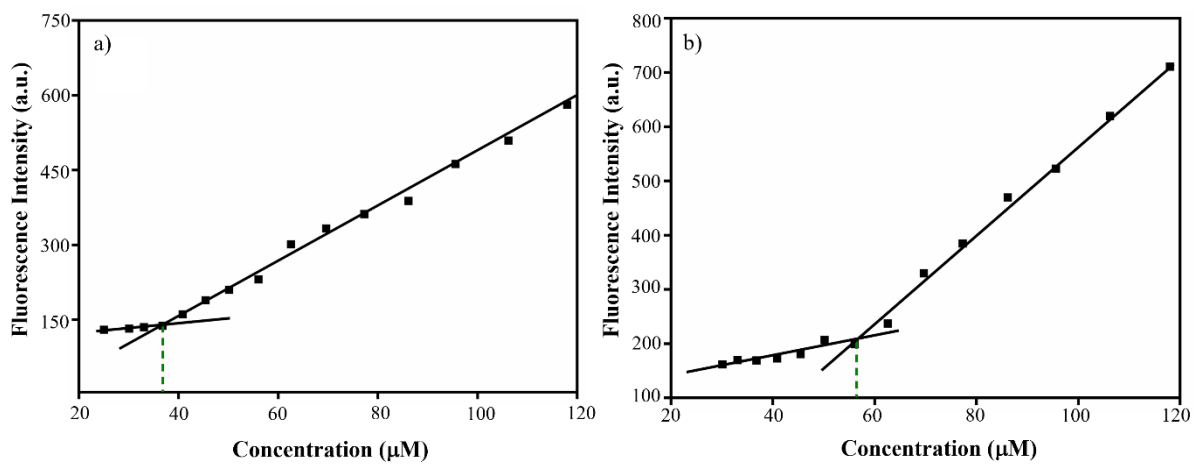

**Fig. S1** Plot of fluorescence intensity against concentration of a) Akd<sup>m</sup>Py and b) Akd<sup>c</sup>Py at 25 °C for determination of CAC.

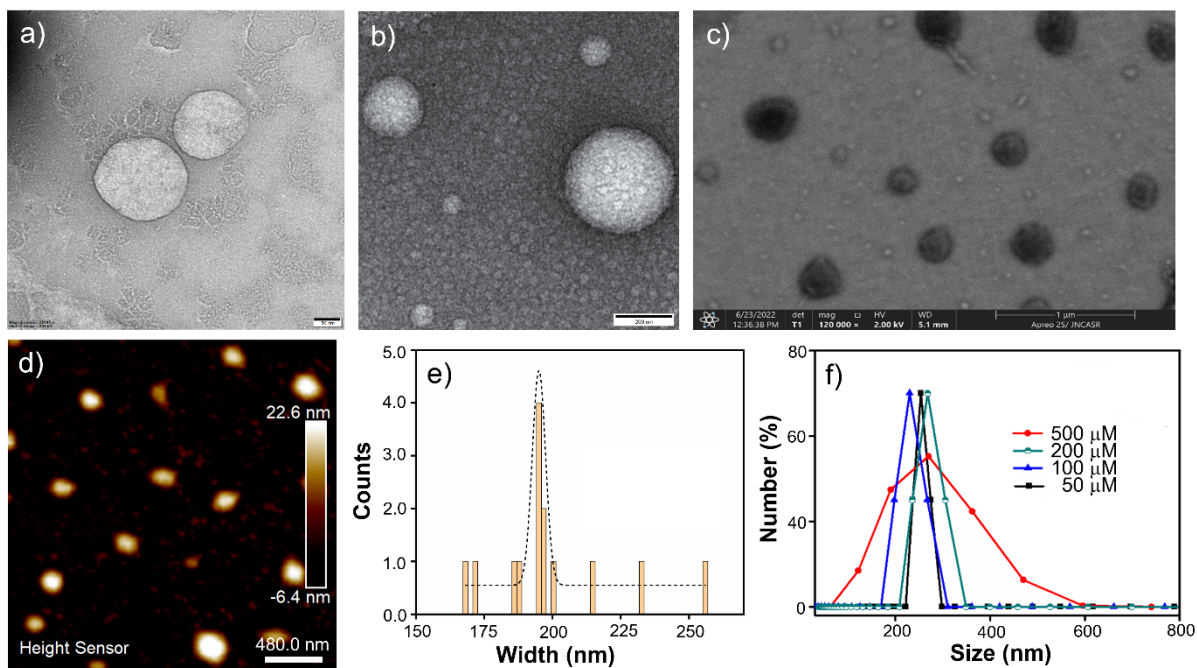

**Fig. S2** a) TEM image, b) high-resolution TEM image, c) FESEM image, and d) AFM image of molecular assembly architectures (vesicles) formed by Akd<sup>c</sup>Py ( $[Akd^cPy] = 100 \mu M$ ); e) Size distribution histogram from AFM with a Gaussian fit; f) Concentration-dependent size distribution profile obtained from DLS for Akd<sup>c</sup>Py vesicle.

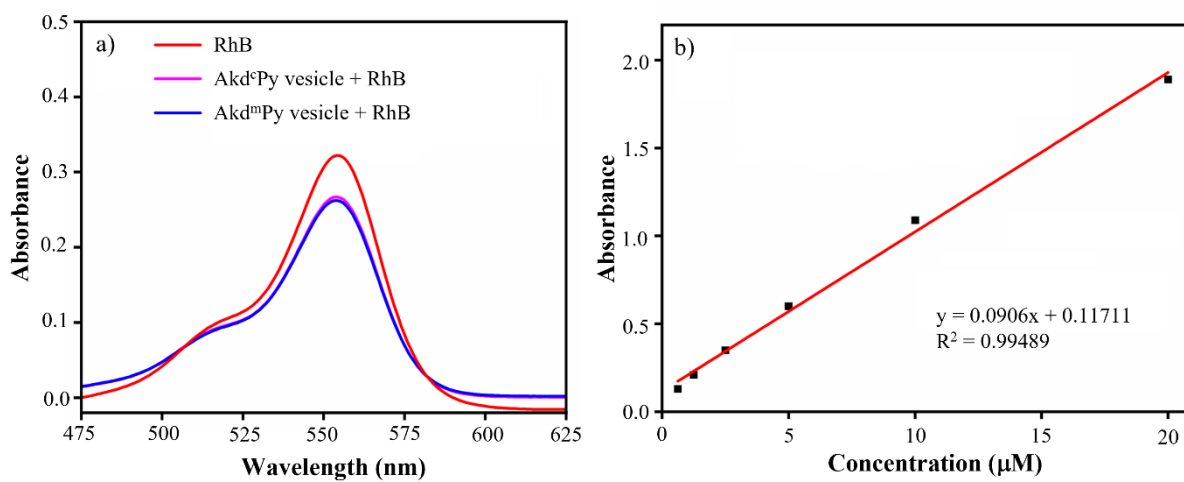

**Fig. S3** a) UV-vis spectra of RhB entrapped within Akd<sup>m</sup>Py and Akd<sup>c</sup>Py vesicles and only RhB in water; b) Calibration plot of RhB in water ( $\lambda_{\max} = 554$  nm, absorbance versus concentration).

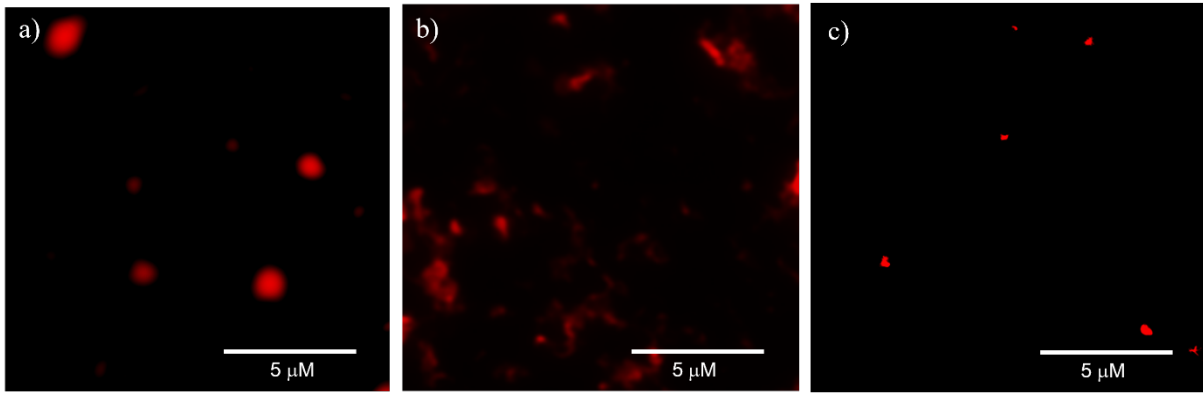

**Fig. S4** Fluorescence microscopy images of a) RhB entrapped within Akd<sup>c</sup>Py vesicles, b) RhB entrapped within Akd<sup>c</sup>Py vesicles after treating with triton X-100 on Akd<sup>c</sup>Py vesicle and c) RhB entrapped within Akd<sup>m</sup>Py vesicles after treating with triton X-100 (Fluorescence microscopy image of RhB entrapped within Akd<sup>m</sup>Py vesicles is shown in Fig. 4a in main manuscript).

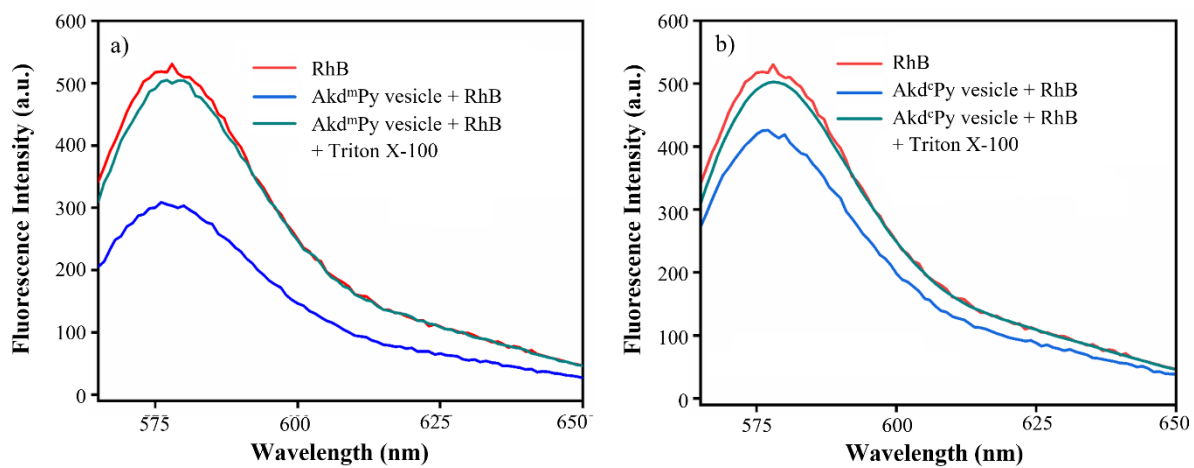

**Fig. S5** Fluorescence emission spectra of only RhB (40  $\mu\text{M}$ ), and RhB entrapped (40  $\mu\text{M}$ ) within a) Akd<sup>m</sup>Py vesicle (100  $\mu\text{M}$ ) and b) Akd<sup>c</sup>Py vesicles (100  $\mu\text{M}$ ), after treating with triton X-100 (0.5% v/v).

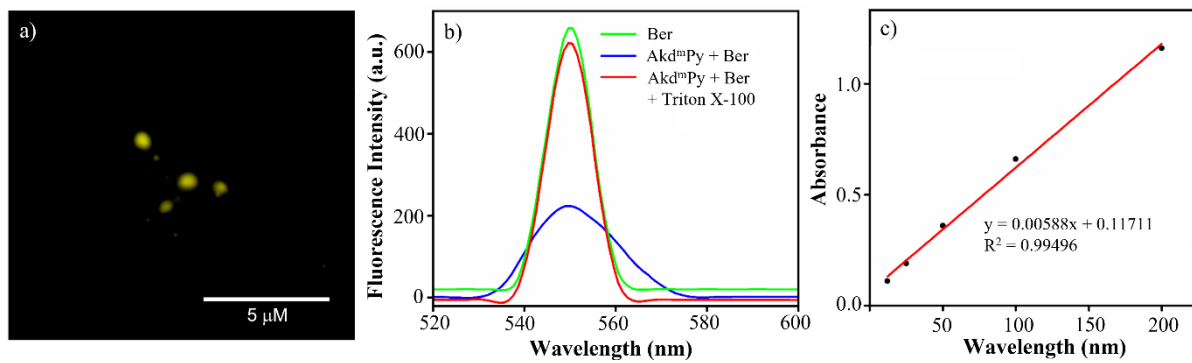

**Fig. S6** a) Fluorescence microscopy image of Ber encapsulated Akd<sup>m</sup>Py vesicles; b) Fluorescence spectra of only Ber and Ber entrapped within Akd<sup>m</sup>Py vesicles, after treating with triton X-100; c) Calibration plot of Ber ( $\lambda_{\text{max}} = 350$  nm, absorbance versus concentration).



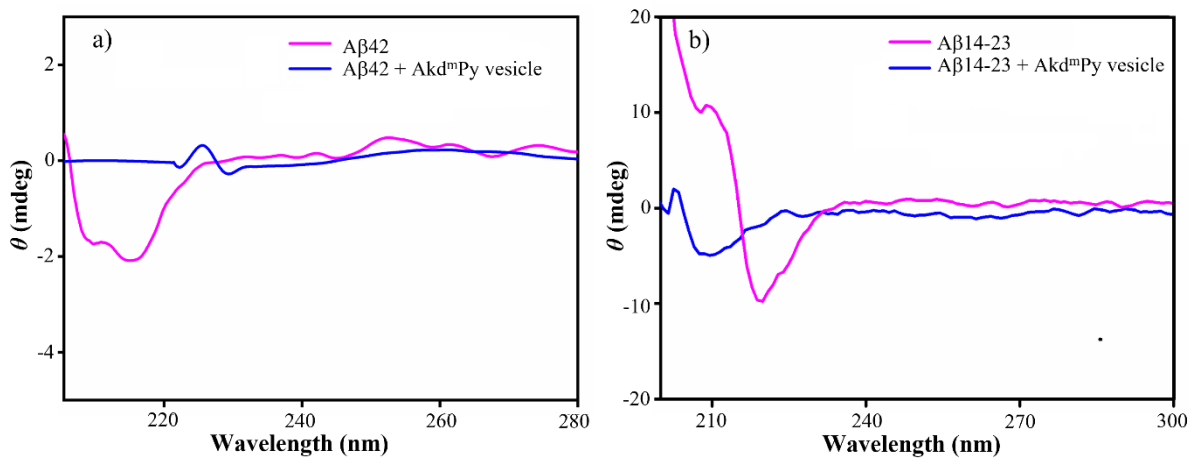

**Fig. S7** CD spectra of a) A $\beta$ 42 fibrils (10  $\mu$ M) and b) A $\beta$ 14-23 fibrils (10  $\mu$ M) in the absence and presence of Akd<sup>m</sup>Py (40  $\mu$ M) vesicles.

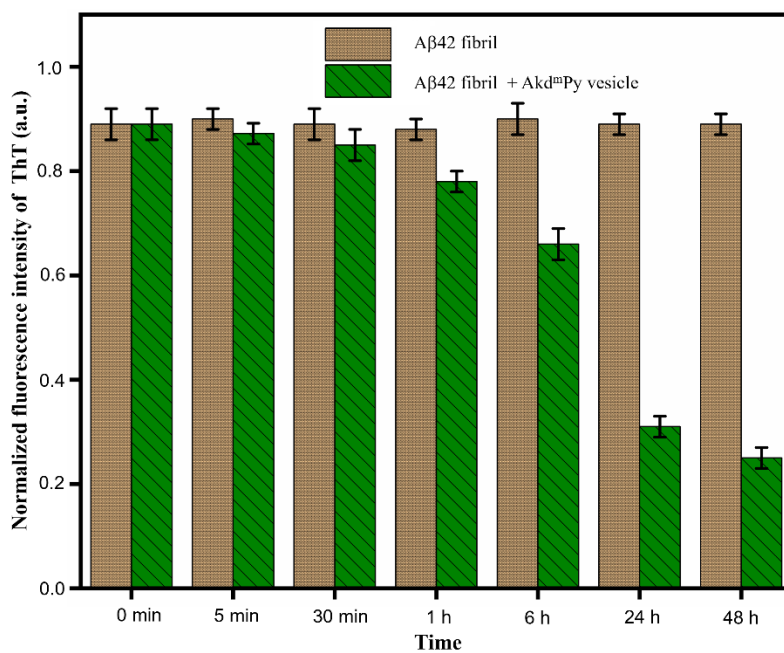

**Fig. S8** Time-dependent ThT (20  $\mu\text{M}$ ) fluorescence data ( $\lambda_{\text{em}} = 482 \text{ nm}$ ) showed dissolution of A $\beta$ 42 fibrils (10  $\mu\text{M}$ ) in the presence of Akd<sup>m</sup>Py vesicle (40  $\mu\text{M}$ ). Percent errors are within  $\pm 5\%$  in triplicate experiments.

**Table S1.** Characterizations of the peptidomimetics by HPLC.

| Peptidomimetics     | HPLC gradient                                                    | Flow rate (ml/min) | Retention time (R <sub>t</sub> ) | Purity (%) | Column                                                         |
|---------------------|------------------------------------------------------------------|--------------------|----------------------------------|------------|----------------------------------------------------------------|
| Akd <sup>n</sup> Py | 0-98 % MeCN (0.1% TFA) in H <sub>2</sub> O (0.1% TFA) for 30 min | 8                  | 17.566                           | >99        | Reverse-phase semi-preparative HPLC with a C18 column at 40 °C |
| Akd <sup>m</sup> Py | 0-98 % MeCN (0.1% TFA) in H <sub>2</sub> O (0.1% TFA) for 25 min | 8                  | 12.568                           | >99        |                                                                |
| Akd <sup>c</sup> Py | 0-98 % MeCN (0.1% TFA) in H <sub>2</sub> O (0.1% TFA) for 25 min | 8                  | 12.515                           | >99        |                                                                |

**Table S2.** Characterizations of the peptidomimetics by HRMS.

| <b>Name</b>         | <b>Sequence</b>                                    | <b>Exact mass</b> | <b>Observed mass<br/>HRMS</b>                                    |
|---------------------|----------------------------------------------------|-------------------|------------------------------------------------------------------|
| Akd <sup>n</sup> Py | Py-kd-His-Gln-Lys-Leu-Val-Phe-<br>Phe-Ala-Glu-Asp  | 1698.8195         | 850.41971 [M/2+H] <sup>+</sup><br>567.61744 [M/3+H] <sup>+</sup> |
| Akd <sup>m</sup> Py | Py- His-Gln-Lys-Leu-Val-kd-Phe-<br>Phe-Ala-Glu-Asp | 1698.8195         | 850.41752 [M/2+H] <sup>+</sup><br>567.28386 [M/3+H] <sup>+</sup> |
| Akd <sup>c</sup> Py | Py- His-Gln-Lys-Leu-Val-Phe-Phe-<br>Ala-Glu-Asp-kd | 1698.8195         | 850.91545 [M/2+H] <sup>+</sup>                                   |

## HPLC chromatogram and HRMS of Akd<sup>c</sup>Py

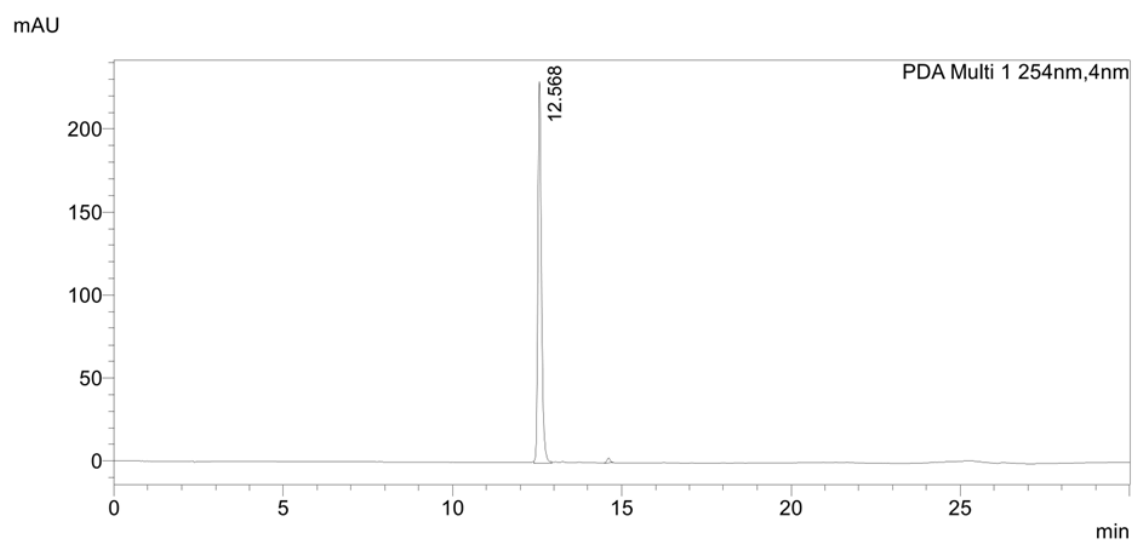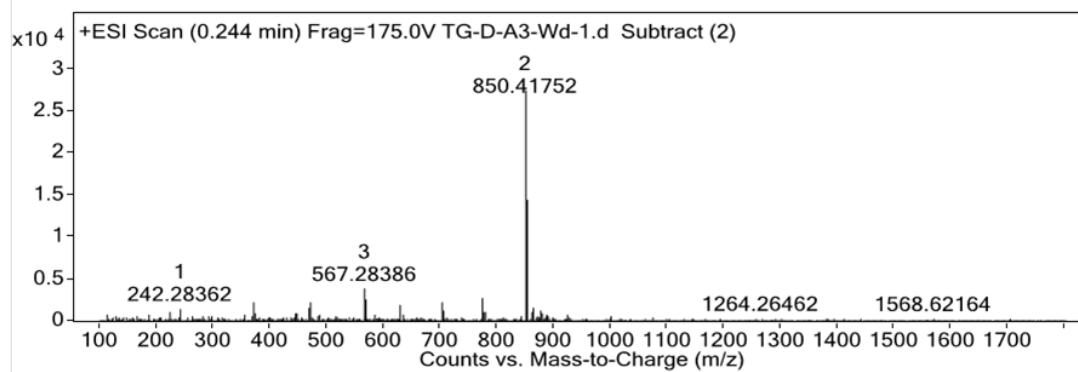

# HPLC chromatogram and HRMS of Akd<sup>m</sup>Py

mAU

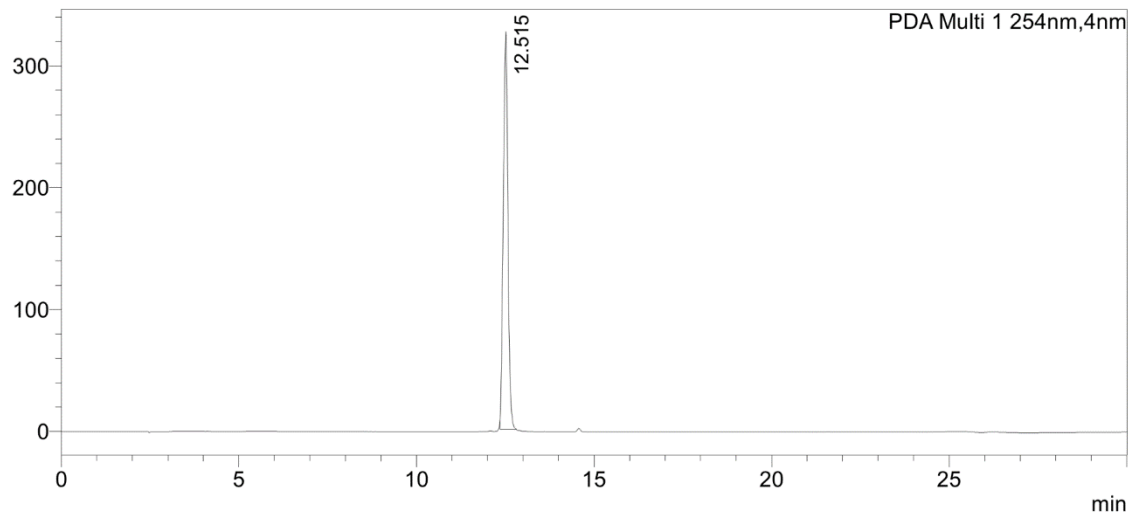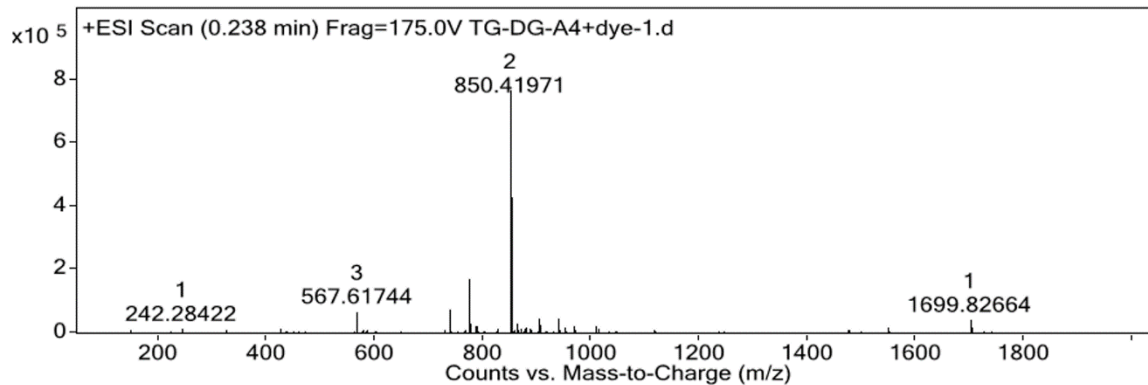

### HPLC chromatogram and HRMS of Akd<sup>n</sup>Py

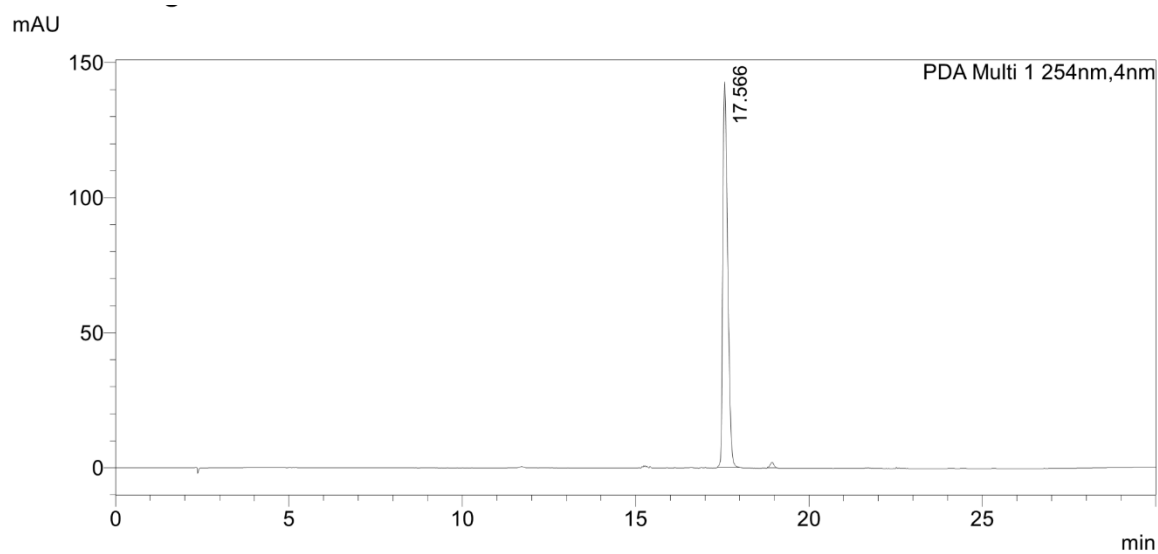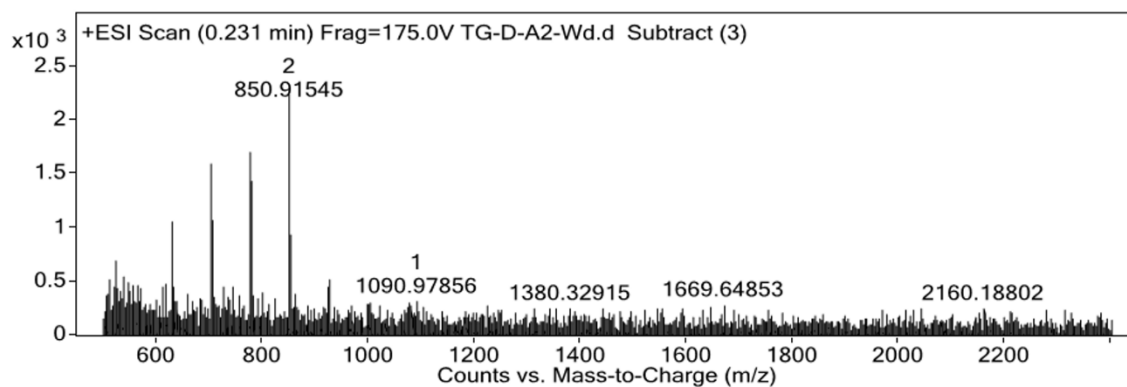

Supplement: d3nr04847k1.pdf [file d3nr04847k1.pdf]
